# Supplementary material for: The formation energy, phase transition, and negative thermal expansion of Fe2−xScxW3O12
Source: Royal Society of Chemistry journal article supplement (doi:10.1039/d3cp04816k), 2023-11-24
Supplement: d3cp04816k1.pdf [file d3cp04816k1.pdf]

## Electronic Supplementary Information

### Formation energy, phase transition and negative thermal expansion of

### $\text{Fe}_{2-x}\text{Sc}_x\text{W}_3\text{O}_{12}$

Gaojie Zeng,<sup>†a</sup> Chunyan Wang,<sup>†abc</sup> Huanli Yuan,<sup>ac</sup> Xi Zhen,<sup>a</sup> Qilong Gao,<sup>a</sup> Juan Guo,<sup>a</sup> Mingju Chao,

<sup>a</sup> Xiansheng Liu<sup>\*b</sup> and Erjun Liang<sup>\*a</sup>

<sup>a</sup> School of Physics & Microelectronics, and Key Laboratory of Materials Physics of Ministry of Education of China, Zhengzhou University, Zhengzhou 450052, China

<sup>b</sup> Henan Key Laboratory of Photovoltaic Materials and School of Future Technology (Quantum Information), Henan University, Kaifeng 475004, China

<sup>c</sup> School of Physics and Telecommunication Engineering, Zhoukou Normal University, Zhoukou 466001, China

<sup>†</sup> Gaojie Zeng and Chunyan Wang contributed equally to this work.

\*Corresponding author. Tel.: +86 371 67767838; fax: +86 371 67766629.

E-mail: xsliu@henu.edu.cn,

ejiang@zzu.edu.cn.

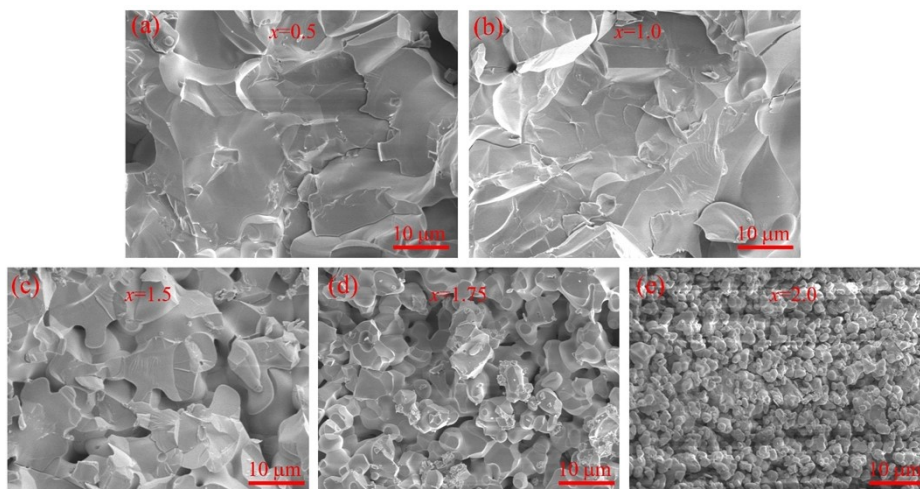

Fig. S1. SEM images (a-e) of  $\text{Fe}_{2-x}\text{Sc}_x\text{W}_3\text{O}_{12}$  ( $x = 0.5, 1.0, 1.5, 1.75, 2.0$ ).

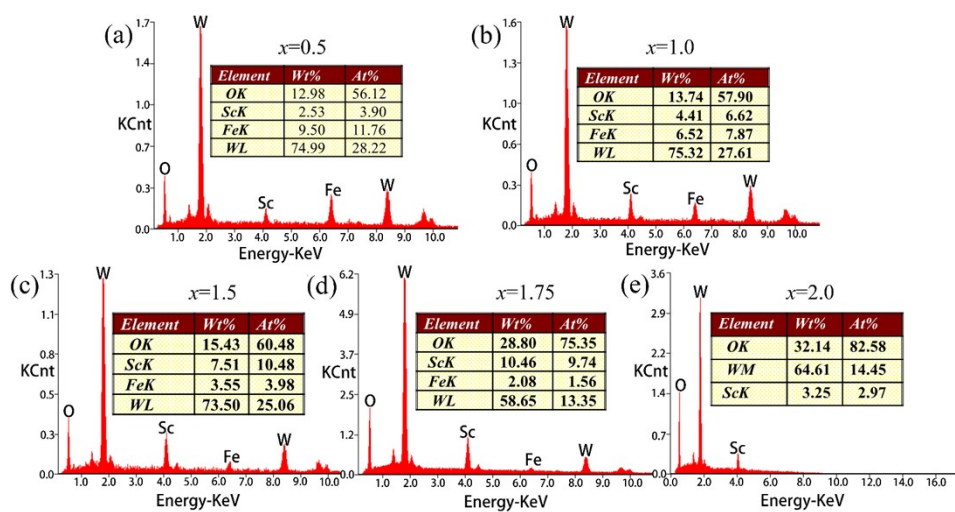

Fig. S2 EDS spectra (a-e) of  $\text{Fe}_{2-x}\text{Sc}_x\text{W}_3\text{O}_{12}$  ( $x = 0.5, 1.0, 1.5, 1.75, 2.0$ ).

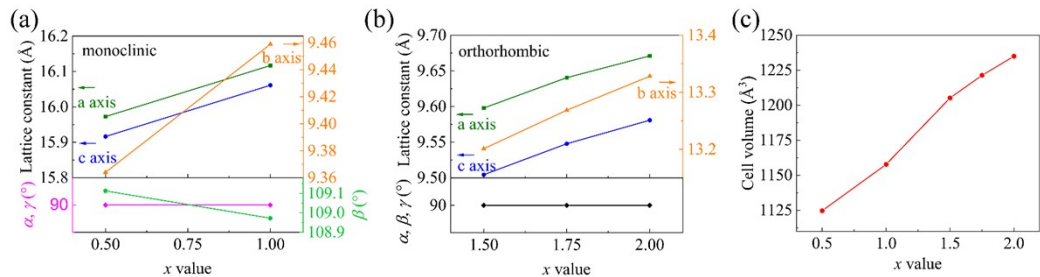

Fig. S3. Cell parameters with  $\text{Sc}^{3+}$  substituting ratio of  $\text{Fe}_{2-x}\text{Sc}_x\text{W}_3\text{O}_{12}$  at RT (detailed cell parameters are given in Table S1): (a) the monoclinic phase for  $x = 0.5, 1.0$ , (b) the orthorhombic phase for  $x = 1.5, 1.75, 2.0$  acquired by Rietveld refinement with FullProf software, (c) cell volume increasing with substituting ratio of  $\text{Sc}^{3+}$  (To facilitate comparison, the cell volumes of monoclinic phase of  $x=0.5, 1.0$  have been divided by 2 as calculated in Ref. <sup>30</sup>)

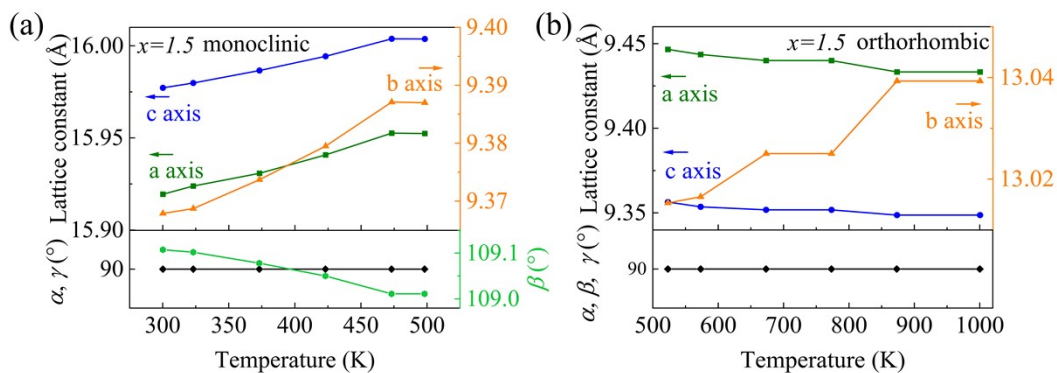

Fig. S4. (a) The monoclinic phase, and (b) the orthorhombic phase parameters change with temperature acquired by Rietveld refinement with FullProf software of  $\text{Fe}_{1.5}\text{Sc}_{0.5}\text{W}_3\text{O}_{12}$ .

## Computational methods

The first-principles calculations are performed based on density of functional theory (DFT) with in the VASP code. The projected augmented wave method is used to describe the valence and core electrons, and the generalized gradient approximation proposed by Perdew–Burke–Ernzerhof for the exchange correlation potential is adopted. The electron wave function is expanded with a cut-off energy of 520 eV, and  $\Gamma$ -centered  $2 \times 4 \times 2$  k-meshes are used to sample their reducible Brillouin zone (BZ). The total energy is calculated with high precision, converged to  $10^{-8}$  eV/atom, and the structural relaxation is stopped when the residual forces become less than  $10^{-4}$  eV/Å. These parameters ensure a good convergence. Derived structural details from the VASP DFT code are at 0 K.

## Details of calculations and parameters

The formation energy of impurities ( $E_{\text{formation}}$ ) is a physical quantity used to judge the difficulty of incorporating different ions into the lattice and characterize the influence of doping on the stability of the system structure. The thermodynamic stability can be expressed by the formation energy ( $E_{\text{form}}$ ) both in monoclinic phase (1) and orthorhombic phase (2) as follows: <sup>37,38</sup>

$$E_{\text{form}} = E_{\text{tot}}(\text{subst}) - E_{\text{tot}}(\text{Fe}_2\text{W}_3\text{O}_{12}) - n\mu_{\text{Sc}} + n\mu_{\text{Fe}} \quad (1)$$

$$E_{\text{form}} = E_{\text{tot}}(\text{subst}) - E_{\text{tot}}(\text{Sc}_2\text{W}_3\text{O}_{12}) - n\mu_{\text{Fe}} + n\mu_{\text{Sc}} \quad (2)$$

where  $E_{\text{tot}}(\text{subst})$  is total energy of doped sample,  $E_{\text{tot}}(\text{Fe}_2\text{W}_3\text{O}_{12})$  and  $E_{\text{tot}}(\text{Sc}_2\text{W}_3\text{O}_{12})$  is the energy of pristine  $\text{Fe}_2\text{W}_3\text{O}_{12}$  and  $\text{Sc}_2\text{W}_3\text{O}_{12}$ ,  $n$  is the number of the Sc atom substituted by Fe atom in primitive cell and  $\mu_{\text{Sc}}$ ,  $\mu_{\text{Fe}}$  is the chemical potential of Sc and Fe, which is determined by the most stable (ground state) metal phase of Sc and Fe, respectively. With increasing the substitution of  $\text{Sc}^{3+}$ , the formation energy is lowered (Figure 1d), which means the material to be more stable.

The formation energy was calculated based on formula (1) and (2) as below:

The DFT calculation process for monoclinic phase:

$$x = 0.5$$

$$\begin{aligned} E_f &= E_{\text{total}}(\text{Fe}_{12}\text{Sc}_4\text{W}_{24}\text{O}_{96}) - E_{\text{total}}(\text{Fe}_{16}\text{W}_{24}\text{O}_{96}) - 4\mu_{\text{Sc}} + 4\mu_{\text{Fe}} \\ &= -1184.0198 - (-1157.1516) - 4(-1.8516866) + 4(-3.034032) \\ &= -31.5974 \text{ eV} \end{aligned}$$

$$x = 1.0$$

$$\begin{aligned} E_f &= E_{\text{total}}(\text{Fe}_8\text{Sc}_8\text{W}_{24}\text{O}_{96}) - E_{\text{total}}(\text{Fe}_{16}\text{W}_{24}\text{O}_{96}) - 8\mu_{\text{Sc}} + 8\mu_{\text{Fe}} \\ &= -1203.0771 - (-1157.1516) - 8(-1.8517) + 8(-3.034) \\ &= -55.3839 \text{ eV} \end{aligned}$$

The DFT calculation process for orthorhombic phase:

$$x = 1.5$$

$$E_f = E_{\text{total}}(\text{Sc}_6\text{Fe}_2\text{W}_{12}\text{O}_{48}) - E_{\text{total}}(\text{Sc}_8\text{W}_{12}\text{O}_{48}) - 2\mu_{\text{Fe}} + 2\mu_{\text{Sc}}$$

$$\begin{aligned}
&= -609.4511 - (-620.397) - 2(-3.0340323) + 2(-1.8516866) \\
&= 13.31205 \text{ eV}
\end{aligned}$$

$$x = 1.75$$

$$\begin{aligned}
E_f &= E_{total}(Sc_7Fe_1W_{12}O_{48}) - E_{total}(Sc_8W_{12}O_{48}) - \mu_{Fe} + \mu_{Sc} \\
&= -614.868 - (-620.397) - (-3.034) + (-1.8517) \\
&= 6.7173 \text{ eV}
\end{aligned}$$

Table S1 Cell parameters at RT of  $\text{Fe}_{2-x}\text{Sc}_x\text{W}_3\text{O}_{12}$  ( $x = 0.5, 1.0, 1.5, 1.75, 2.0$ ) acquired by Rietveld refinement with FullProf software.

|                     |                       | $\text{Fe}_{1.5}\text{Sc}_{0.5}\text{W}_3\text{O}_{12}$ | $\text{Fe}_{1.0}\text{Sc}_{1.0}\text{W}_3\text{O}_{12}$   |                                      |
|---------------------|-----------------------|---------------------------------------------------------|-----------------------------------------------------------|--------------------------------------|
| Monoclinic $P2_1/c$ | $a$ (Å)               | 15.9726                                                 | 16.1169                                                   |                                      |
|                     | $b$ (Å)               | 9.3645                                                  | 9.4591                                                    |                                      |
|                     | $c$ (Å)               | 15.9163                                                 | 16.0613                                                   |                                      |
|                     | $\alpha$ (°)          | 90                                                      | 90                                                        |                                      |
|                     | $\beta$ (°)           | 109.1129                                                | 108.9722                                                  |                                      |
|                     | $\gamma$ (°)          | 90                                                      | 90                                                        |                                      |
|                     | $V$ (Å <sup>3</sup> ) | 2249.426                                                | 2315.578                                                  |                                      |
|                     |                       | $\text{Fe}_{0.5}\text{Sc}_{1.5}\text{W}_3\text{O}_{12}$ | $\text{Fe}_{0.25}\text{Sc}_{1.75}\text{W}_3\text{O}_{12}$ | $\text{Sc}_2\text{W}_3\text{O}_{12}$ |
| Orthorhombic $Pnca$ | $a$ (Å)               | 9.5979                                                  | 9.6405                                                    | 9.6711                               |
|                     | $b$ (Å)               | 13.2011                                                 | 13.2686                                                   | 13.3282                              |
|                     | $c$ (Å)               | 9.5044                                                  | 9.5478                                                    | 9.5808                               |
|                     | $\alpha$ (°)          | 90                                                      | 90                                                        | 90                                   |
|                     | $\beta$ (°)           | 90                                                      | 90                                                        | 90                                   |
|                     | $\gamma$ (°)          | 90                                                      | 90                                                        | 90                                   |
|                     | $V$ (Å <sup>3</sup> ) | 1205.197                                                | 1221.337                                                  | 1234.937                             |

Table S2. Structural parameters of  $\text{Sc}_2\text{W}_3\text{O}_{12}$  after refinement of XRD data at RT.

| Atom | occ. | $x$    | $y$    | $z$    | $B$   |
|------|------|--------|--------|--------|-------|
| Sc1  | 1    | 0.4676 | 0.3810 | 0.2480 | 0.622 |
| W1   | 0.5  | 1/4    | 0      | 0.4729 | 0.641 |
| W2   | 1    | 0.1168 | 0.3557 | 0.3944 | 0.624 |
| O1   | 1    | 0.0974 | 0.1397 | 0.0763 | 1.232 |
| O2   | 1    | 0.1392 | 0.0705 | 0.3664 | 1.931 |
| O3   | 1    | 0.0154 | 0.2598 | 0.3188 | 0.897 |
| O4   | 1    | 0.3314 | 0.4072 | 0.0774 | 1.233 |
| O5   | 1    | 0.0711 | 0.4722 | 0.3256 | 0.490 |
| O6   | 1    | 0.2947 | 0.3288 | 0.3586 | 1.831 |

Table S3. Structural parameters of  $\text{Fe}_{0.25}\text{Sc}_{1.75}\text{W}_3\text{O}_{12}$  after refinement of XRD data at RT.

| Atom | Occ.  | $x$      | $y$     | $z$    | $B$   |
|------|-------|----------|---------|--------|-------|
| Sc1  | 0.875 | 0.4678   | 0.3795  | 0.2498 | 0.001 |
| Fe1  | 0.125 | 0.4678   | 0.3795  | 0.2498 | 0.001 |
| W1   | 0.5   | 1/4      | 0       | 0.4730 | 0.516 |
| W2   | 1     | 0.11678  | 0.3561  | 0.3956 | 0.348 |
| O1   | 1     | 0.09261  | 0.1405  | 0.0881 | 1.069 |
| O2   | 1     | 0.13184  | 0.0617  | 0.3631 | 3.014 |
| O3   | 1     | -0.01086 | 0.2669  | 0.3101 | 5.246 |
| O4   | 1     | 0.34159  | 0.3986  | 0.0832 | 3.376 |
| O5   | 1     | 0.05485  | 0.4759  | 0.3157 | 3.703 |
| O6   | 1     | 0.30055  | 0.33181 | 0.3597 | 0.713 |

Table S4. Structural parameters of  $\text{Fe}_{0.5}\text{Sc}_{1.5}\text{W}_3\text{O}_{12}$  after refinement of XRD data at RT.

| Atom | Occ. | $x$     | $y$    | $z$    | $B$   |
|------|------|---------|--------|--------|-------|
| Sc1  | 0.75 | 0.4672  | 0.3803 | 0.2494 | 0.104 |
| Fe1  | 0.25 | 0.4672  | 0.3803 | 0.2494 | 0.104 |
| W1   | 0.5  | 1/4     | 0      | 0.4735 | 0.515 |
| W2   | 1    | 0.1175  | 0.3559 | 0.3955 | 0.429 |
| O1   | 1    | 0.0884  | 0.1336 | 0.0871 | 1.286 |
| O2   | 1    | 0.1272  | 0.0628 | 0.3728 | 2.922 |
| O3   | 1    | -0.0025 | 0.2692 | 0.3077 | 3.709 |
| O4   | 1    | 0.3389  | 0.4001 | 0.0933 | 3.527 |
| O5   | 1    | 0.0559  | 0.4727 | 0.3163 | 5.047 |
| O6   | 1    | 0.2995  | 0.3346 | 0.3577 | 1.066 |

Table S5. Structural parameters of  $\text{Fe}_{1.0}\text{Sc}_{1.0}\text{W}_3\text{O}_{12}$  after refinement of XRD data at RT.

| Atom | Occ. | $x$    | $y$    | $z$    | $B$   |
|------|------|--------|--------|--------|-------|
| Fe0  | 1    | 0.0757 | 0.0160 | 0.1812 | 0.242 |
| Sc1  | 1    | 0.5551 | 0.4524 | 0.1776 | 0.258 |
| Fe2  | 1    | 0.1909 | 0.4671 | 0.0685 | 1.220 |
| Sc3  | 1    | 0.6823 | 0.0006 | 0.0546 | 2.827 |
| W5   | 1    | 0.0185 | 0.7527 | 0.0070 | 0.576 |
| W6   | 1    | 0.1174 | 0.3845 | 0.2604 | 0.369 |
| W7   | 1    | 0.2843 | 0.1212 | 0.1361 | 0.198 |
| W8   | 1    | 0.4891 | 0.2511 | 0.4798 | 0.210 |
| W9   | 1    | 0.6299 | 0.1300 | 0.2762 | 0.742 |
| W10  | 1    | 0.7525 | 0.3927 | 0.1157 | 1.378 |
| O11  | 1    | 0.0010 | 0.1373 | 0.0895 | 0.500 |
| O12  | 1    | 0.0128 | 0.4604 | 0.2644 | 0.500 |
| O13  | 1    | 0.0563 | 0.8536 | 0.1045 | 0.500 |
| O14  | 1    | 0.0861 | 0.6099 | 0.0065 | 0.500 |
| O15  | 1    | 0.0939 | 0.1889 | 0.4994 | 0.500 |
| O16  | 1    | 0.1087 | 0.1938 | 0.2655 | 0.500 |
| O17  | 1    | 0.1374 | 0.4432 | 0.1701 | 0.500 |
| O18  | 1    | 0.1884 | 0.0661 | 0.1503 | 0.500 |
| O19  | 1    | 0.1993 | 0.4378 | 0.3647 | 0.500 |
| O20  | 1    | 0.2272 | 0.0194 | 0.4593 | 0.500 |
| O21  | 1    | 0.2675 | 0.6171 | 0.1250 | 0.500 |
| O22  | 1    | 0.2743 | 0.3171 | 0.1181 | 0.500 |
| O23  | 1    | 0.3074 | 0.0403 | 0.0496 | 0.500 |
| O24  | 1    | 0.3772 | 0.1027 | 0.2401 | 0.500 |
| O25  | 1    | 0.3790 | 0.3423 | 0.4241 | 0.500 |
| O26  | 1    | 0.4753 | 0.3088 | 0.0876 | 0.500 |
| O27  | 1    | 0.4999 | 0.1128 | 0.4182 | 0.500 |
| O28  | 1    | 0.5544 | 0.0026 | 0.2800 | 0.500 |
| O29  | 1    | 0.5674 | 0.1182 | 0.0030 | 0.500 |
| O30  | 1    | 0.5949 | 0.3063 | 0.2669 | 0.500 |
| O31  | 1    | 0.6443 | 0.4253 | 0.1218 | 0.500 |
| O32  | 1    | 0.6715 | 0.0925 | 0.1833 | 0.500 |
| O33  | 1    | 0.7464 | 0.2146 | 0.0621 | 0.500 |
| O34  | 1    | 0.8324 | 0.3935 | 0.2160 | 0.500 |



Table S6. Structural parameters of  $\text{Fe}_{1.5}\text{Sc}_{0.5}\text{W}_3\text{O}_{12}$  after refinement of XRD data at RT.

| Atom | Occ. | <i>x</i> | <i>y</i> | <i>z</i> | <i>B</i> |
|------|------|----------|----------|----------|----------|
| Fe0  | 1    | 0.0759   | 0.0191   | 0.1781   | 0.228    |
| Fe1  | 1    | 0.1809   | 0.4790   | 0.0744   | 1.220    |
| Fe2  | 1    | 0.5508   | 0.4708   | 0.1834   | 0.258    |
| Sc3  | 1    | 0.6893   | 0.0301   | 0.0607   | 2.827    |
| W5   | 1    | 0.0152   | 0.7551   | 0.0026   | 0.349    |
| W6   | 1    | 0.1157   | 0.3862   | 0.2618   | 0.601    |
| W7   | 1    | 0.2840   | 0.1270   | 0.1355   | 0.198    |
| W8   | 1    | 0.4848   | 0.2503   | 0.4837   | 0.210    |
| W9   | 1    | 0.6340   | 0.1292   | 0.2728   | 0.742    |
| W10  | 1    | 0.7536   | 0.3955   | 0.1106   | 1.378    |
| O11  | 1    | 0.0010   | 0.1373   | 0.0889   | 1.098    |
| O12  | 1    | 0.0128   | 0.4604   | 0.2680   | 1.098    |
| O13  | 1    | 0.0563   | 0.8536   | 0.1035   | 1.098    |
| O14  | 1    | 0.0861   | 0.6099   | 0.0000   | 1.098    |
| O15  | 1    | 0.0939   | 0.1889   | 0.4990   | 1.098    |
| O16  | 1    | 0.1087   | 0.1938   | 0.2650   | 1.098    |
| O17  | 1    | 0.1374   | 0.4432   | 0.1650   | 1.098    |
| O18  | 1    | 0.1884   | 0.0661   | 0.1520   | 1.098    |
| O19  | 1    | 0.1993   | 0.4378   | 0.3660   | 1.098    |
| O20  | 1    | 0.2272   | 0.0194   | 0.4610   | 1.098    |
| O21  | 1    | 0.2675   | 0.6171   | 0.1250   | 1.098    |
| O22  | 1    | 0.2743   | 0.3171   | 0.1181   | 1.098    |
| O23  | 1    | 0.3074   | 0.0403   | 0.0496   | 1.098    |
| O24  | 1    | 0.3772   | 0.1027   | 0.2401   | 1.098    |
| O25  | 1    | 0.3790   | 0.3423   | 0.4241   | 1.098    |
| O26  | 1    | 0.4753   | 0.3088   | 0.0876   | 1.098    |
| O27  | 1    | 0.4999   | 0.1128   | 0.4182   | 1.098    |
| O28  | 1    | 0.5544   | 0.0026   | 0.2800   | 1.098    |
| O29  | 1    | 0.5674   | 0.1182   | 0.0030   | 1.098    |
| O30  | 1    | 0.5949   | 0.3063   | 0.2669   | 1.098    |
| O31  | 1    | 0.6443   | 0.4253   | 0.1218   | 1.098    |
| O32  | 1    | 0.6715   | 0.0925   | 0.1833   | 1.098    |
| O33  | 1    | 0.7464   | 0.2146   | 0.0621   | 1.098    |
| O34  | 1    | 0.8324   | 0.3935   | 0.2160   | 1.098    |

Table S7. The lowest energy after optimizing structures by DFT calculation for  $\text{Fe}_{2-x}\text{Sc}_x\text{W}_3\text{O}_{12}$  both in monoclinic phase ( $x=0.0, 0.5, 1.0$ ) and orthorhombic phase ( $x=1.5, 1.75, 2.0$ ).

| Molecular formula                                                                    | Unit cell formula                                     | Total energy in a unit cell |
|--------------------------------------------------------------------------------------|-------------------------------------------------------|-----------------------------|
| <i>Mono</i> : $\text{Fe}_2\text{W}_3\text{O}_{12}$ ( $x=0.0$ )                       | $\text{Fe}_{16}\text{W}_{24}\text{O}_{96}$            | -1157.1516 eV               |
| <i>Mono</i> : $\text{Fe}_{1.5}\text{Sc}_{0.5}\text{W}_3\text{O}_{12}$ ( $x=0.5$ )    | $\text{Fe}_{12}\text{Sc}_4\text{W}_{24}\text{O}_{96}$ | -1184.0198 eV               |
| <i>Mono</i> : $\text{Fe}_{1.0}\text{Sc}_{1.0}\text{W}_3\text{O}_{12}$ ( $x=1.0$ )    | $\text{Fe}_8\text{Sc}_8\text{W}_{24}\text{O}_{96}$    | -1203.0771 eV               |
| <i>Orth</i> : $\text{Fe}_{0.5}\text{Sc}_{1.5}\text{W}_3\text{O}_{12}$ ( $x=1.5$ )    | $\text{Sc}_6\text{Fe}_2\text{W}_{12}\text{O}_{48}$    | -609.4511 eV                |
| <i>Orth</i> : $\text{Fe}_{0.25}\text{Sc}_{1.75}\text{W}_3\text{O}_{12}$ ( $x=1.75$ ) | $\text{Sc}_7\text{Fe}_1\text{W}_{12}\text{O}_{48}$    | -614.8677 eV                |
| <i>Orth</i> : $\text{Sc}_2\text{W}_3\text{O}_{12}$ ( $x=2.0$ )                       | $\text{Sc}_8\text{W}_{12}\text{O}_{48}$               | -620.397 eV                 |

The potential energy of Fe and Sc:  $\mu_{\text{Fe}} = -3.0340$  eV  $\mu_{\text{Sc}} = -1.8516$  eV

Table S8. List of electronegativity of elements used in this work.

| Element | Allred-Rochow <sup>39, 40</sup> |
|---------|---------------------------------|
| Sc      | 1.2                             |
| Al      | 1.47                            |
| Fe      | 1.64                            |
| In      | 1.49                            |
| Ga      | 1.82                            |
| Hf      | 1.23                            |
| Mg      | 1.23                            |
| W       | 1.4                             |

Table S9. Averaged effective electronegativities ( $\chi_{eff}$ ) of tungstate  $A_2W_3O_{12}$ -based compounds are calculated using the Allred-Rochow's scale and the corresponding phase transition temperatures acquired from references.

| Tungstate $A_2W_3O_{12}$ -based compounds | $\chi_{eff}$ | Phase transition temperature (K) | References         |
|-------------------------------------------|--------------|----------------------------------|--------------------|
| $In_2W_3O_{12}$                           | -0.101       | 521.15                           |                    |
| $In_{1.9}Sc_{0.1}W_3O_{12}$               | -0.104       | 497.15                           |                    |
| $In_{1.7}Sc_{0.3}W_3O_{12}$               | -0.108       | 487.32                           | Ref. <sup>43</sup> |
| $In_{1.5}Sc_{0.5}W_3O_{12}$               | -0.113       | 420.15                           |                    |
| $InScW_3O_{12}$                           | -0.125       | 320.15                           |                    |
| $Al_2W_3O_{12}$                           | -0.105       | 251.25                           |                    |
| $Al_{1.9}Sc_{0.1}W_3O_{12}$               | -0.107       | 237.95                           |                    |
| $Al_{1.8}Sc_{0.2}W_3O_{12}$               | -0.109       | 212.75                           | Ref. <sup>44</sup> |
| $Al_{1.7}Sc_{0.3}W_3O_{12}$               | -0.111       | 175.05                           |                    |
| $Al_{1.8}(ZrMg)_{0.1}W_3O_{12}$           | -0.109       | 230                              |                    |
| $Al_2W_3O_{12}$                           | -0.105       | 252.15                           |                    |
| $Al_{1.9}Ga_{0.1}W_3O_{12}$               | -0.102       | 294.15                           |                    |
| $Al_{1.8}Ga_{0.2}W_3O_{12}$               | -0.099       | 333.15                           | Ref. <sup>44</sup> |
| $Al_{1.7}Ga_{0.3}W_3O_{12}$               | -0.096       | 364.15                           |                    |
| $Al_{1.6}Ga_{0.4}W_3O_{12}$               | -0.093       | 381.15                           |                    |
| $Fe_2W_3O_{12}$                           | -0.076       | 687                              |                    |
| $Fe_{1.5}Sc_{0.5}W_3O_{12}$               | -0.095       | 490                              | Ref. <sup>34</sup> |
| $Fe_{1.0}Sc_{1.0}W_3O_{12}$               | -0.113       | 320                              | this work          |
| $Fe_{0.5}Sc_{1.5}W_3O_{12}$               | -0.131       | 210                              |                    |
| $Fe_{1.0}(HfMg)_{0.5}W_3O_{12}$           | -0.110       | 400                              |                    |
| $Fe_{1.4}(HfMg)_{0.3}W_3O_{12}$           | -0.097       | 498                              | Ref. <sup>42</sup> |
